# Supplementary material for: A mitochondria-targeting ratiometric fluorescent probe for the detection of sulfur dioxide in living cells
Source: Royal Society of Chemistry journal article supplement (doi:10.1039/d0nj02461a), 2020-01-01
Supplement: d0nj02461a1.pdf [file d0nj02461a1.pdf]

*Supporting information for*

**Mitochondrial-targeted ratiometric fluorescent probe for the  
detection of sulfur dioxide in living cells**

Yaru Lu, Baoli Dong, Wenhui Song, Yaru Sun, Abdul Hadi Mehmood and Weiying Lin\*

Institute of Fluorescent Probes for Biological Imaging, School of Chemistry and Chemical  
Engineering, School of Materials Science and Engineering, University of Jinan, Jinan, Shandong  
250022, People's Republic of China

E-mail: [weiyinglin2013@163.com](mailto:weiyinglin2013@163.com)

## Materials and instruments

The chemical reagents used in the experiments were all commercially available and could be used without further purification. The water in the experiment was double distilled water. Column chromatography used the silica gel (screen 200-300) purchased from Qingdao Ocean Chemicals Company. NMR spectra were obtained by an AVANCE III 400 MHz digital NMR spectrometer with tetramethylsilane (TMS) as a standard compound. High resolution mass spectra (HRMS) were recorded using a Bruker APEX IV-FTMS 7.0 T mass spectrometer. The UV absorption spectrum were measured with a Shimadzu UV-2600 spectrophotometer. The fluorescence emission spectrum were carried out on a Hitachi F4600 fluorescence spectrophotometer.

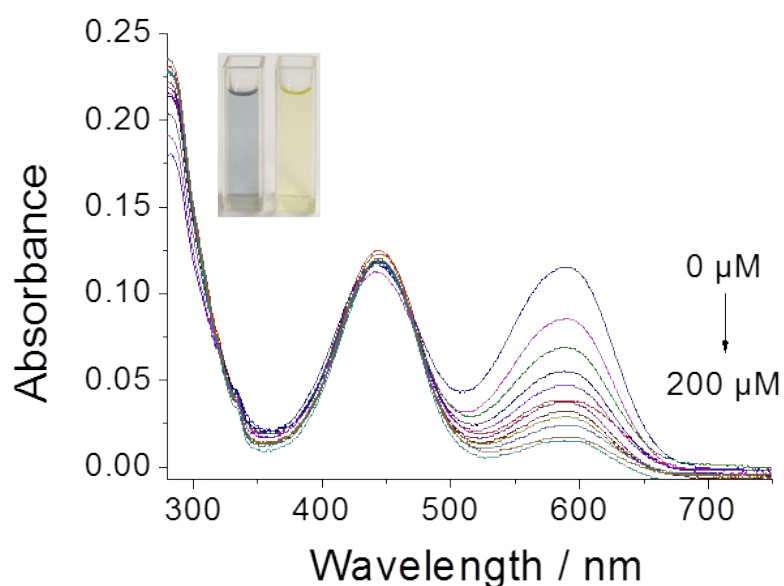

**Fig. S1** UV-Vis spectra of 5 μM MNP in the absence and presence of Na<sub>2</sub>SO<sub>3</sub> in PBS (pH = 7.4, 10% CH<sub>3</sub>CN, 20 mM). Inset: Images of the probe in the absence (left) and presence (right) of 100 μM Na<sub>2</sub>SO<sub>3</sub>.

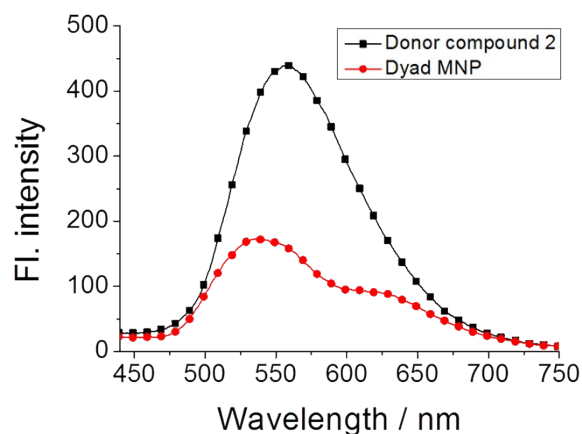

**Fig. S2** Emission spectra of donor compound 2 (5  $\mu\text{M}$ , red circle) and dyad MNP (5 $\mu\text{M}$ , blacks quare) in aqueous solution (pH = 7.4, 10%  $\text{CH}_3\text{CN}$ , 20 mM).

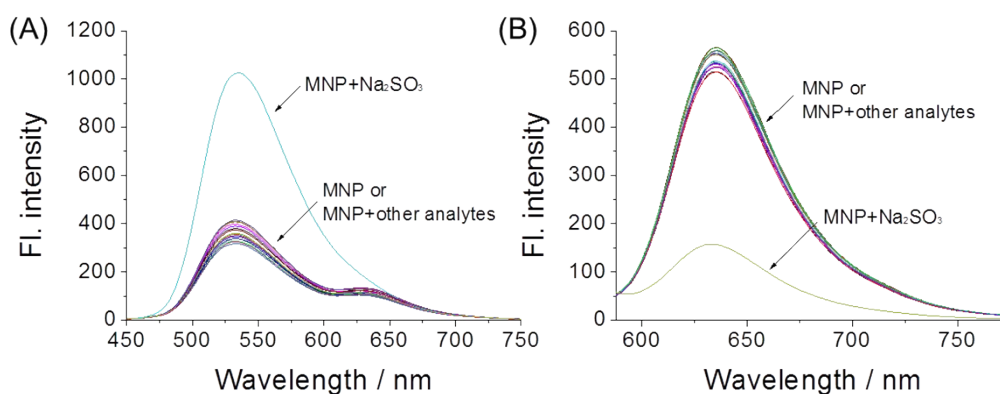

**Fig. S3** Fluorescence spectra of 5  $\mu\text{M}$  MNP in the presence of various species in PBS buffer (pH = 7.4, 10%  $\text{CH}_3\text{CN}$ , 20 mM) under excitation at 405 (A) and 561 nm (B). Concentration: GSH, 10 mM; Cys, 1 mM; other analytes, 100  $\mu\text{M}$ .

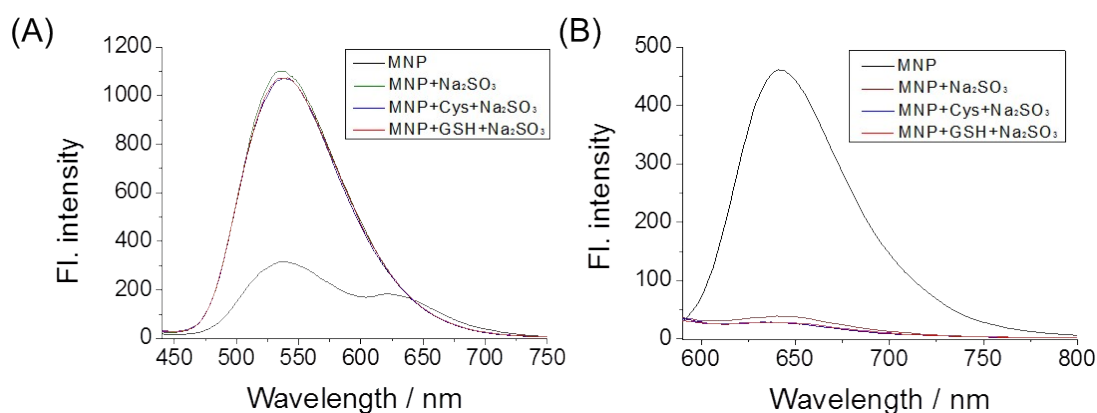

**Fig. S4** Fluorescence spectra of 5  $\mu\text{M}$  MNP in the absence and presence of higher concentration of Cys and GSH in PBS buffer (pH = 7.4, 10%  $\text{CH}_3\text{CN}$ , 20 mM)

under excitation at 405 (A) and 561 nm (B). Concentration: GSH, 10 mM; Cys, 1 mM; Na<sub>2</sub>SO<sub>3</sub>, 200 μM.

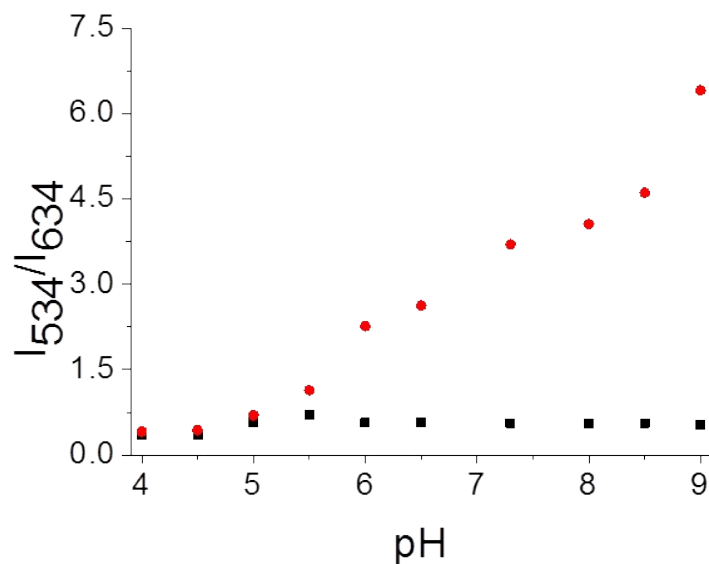

**Fig. S5** Fluorescence intensity ratios ( $I_{534}/I_{634}$ ) of **MNP** in the absence (black) and presence (red) of 100 μM Na<sub>2</sub>SO<sub>3</sub> at various pH conditions.  $\lambda_{ex}$  = 405 and 561 nm.

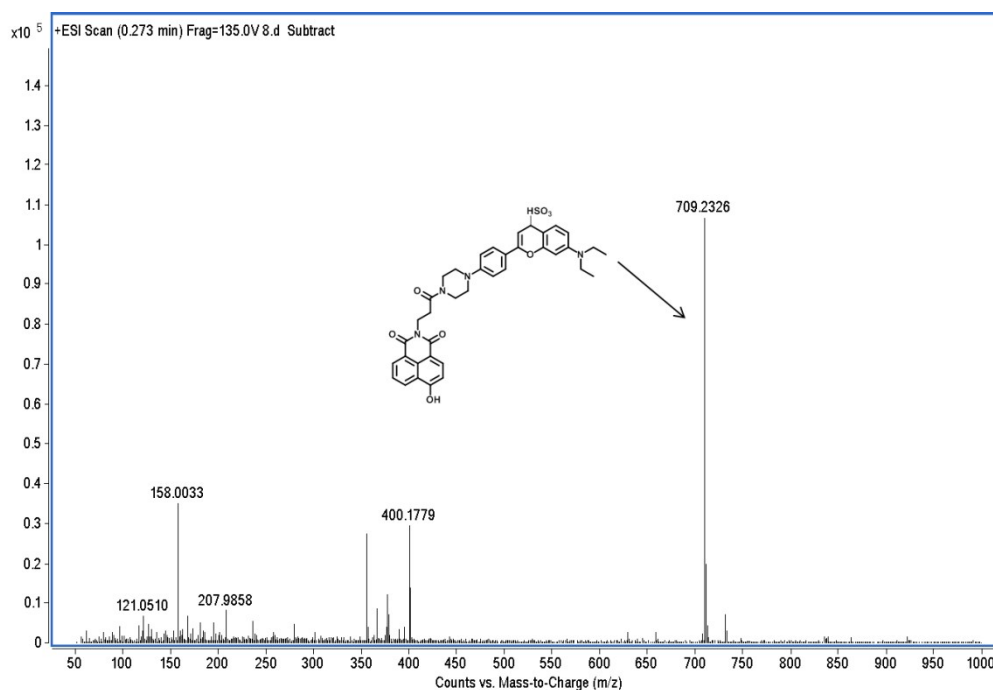

**Fig. S6** HRMS data of the reaction product of the probe **MNP** with Na<sub>2</sub>SO<sub>3</sub>.

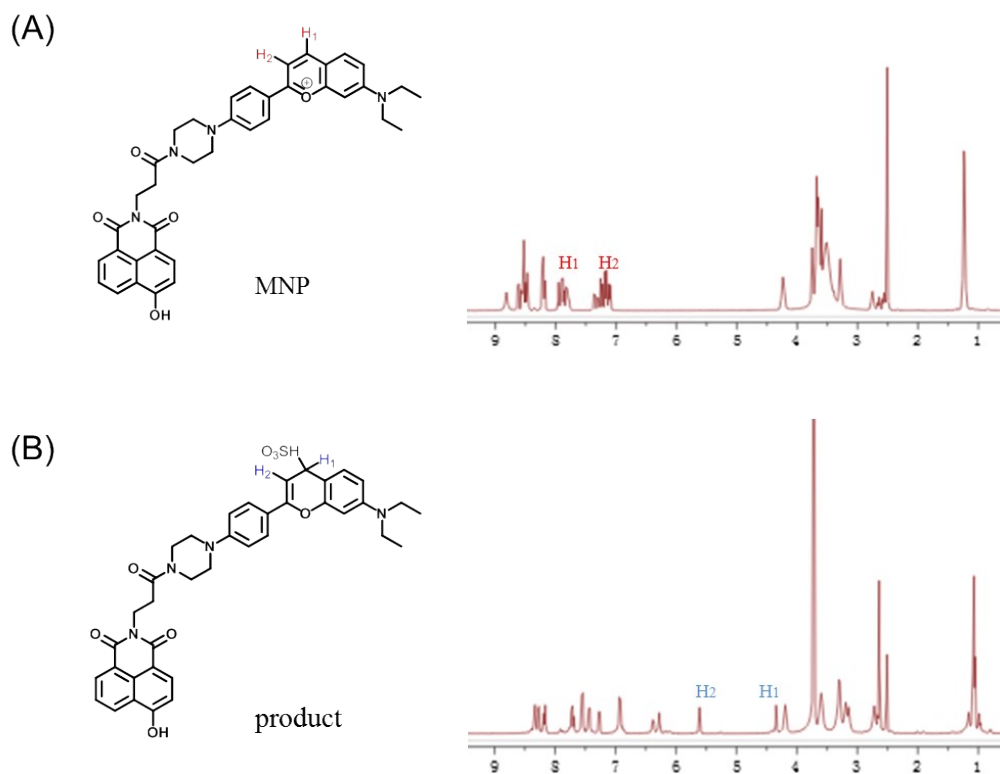

**Fig. S7**  $^1\text{H}$  NMR spectral changes of probe **MNP** and the product of MNP with  $\text{SO}_3^{2-}$  in a  $\text{DMSO-}d_6/\text{D}_2\text{O}$  (v/v =4:1) solution.

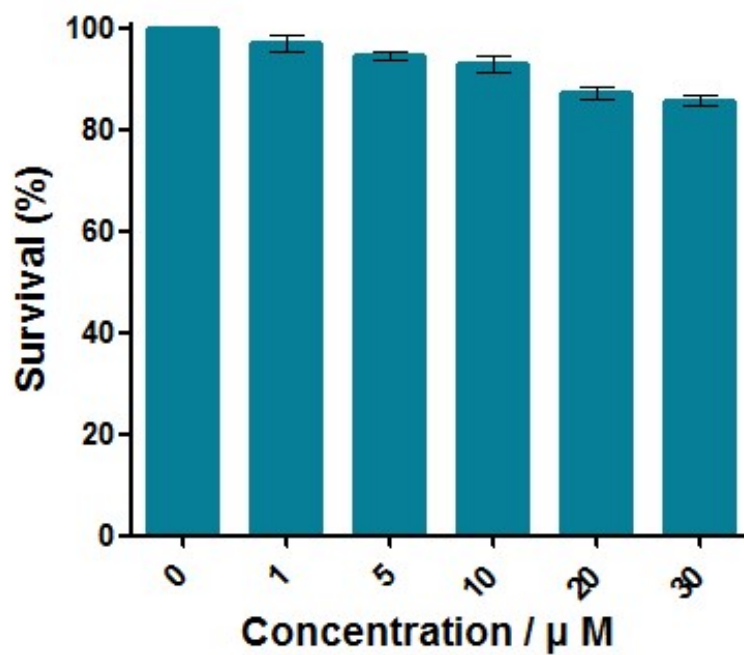

**Fig. S8** Survival of HeLa cells in the presence of **MNP** at various concentrations measured using MTT assay.

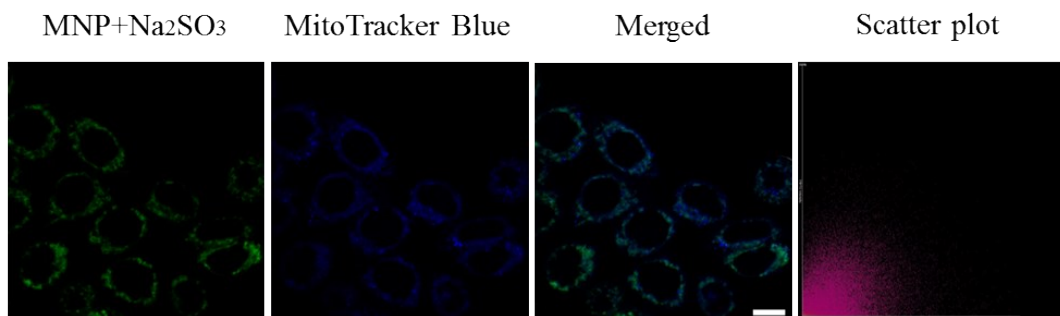

**Fig. S9** Images of HeLa cells costained with 5  $\mu\text{M}$  MNP for 30 min and then treated with 100  $\mu\text{M}$   $\text{Na}_2\text{SO}_3$  for another 30 min, next treated with 1  $\mu\text{M}$  MitoTracker Blue for 5 min, and the co-localization coefficient of MNP and Mito-Tracker Blue. Scale bar = 10  $\mu\text{m}$ .

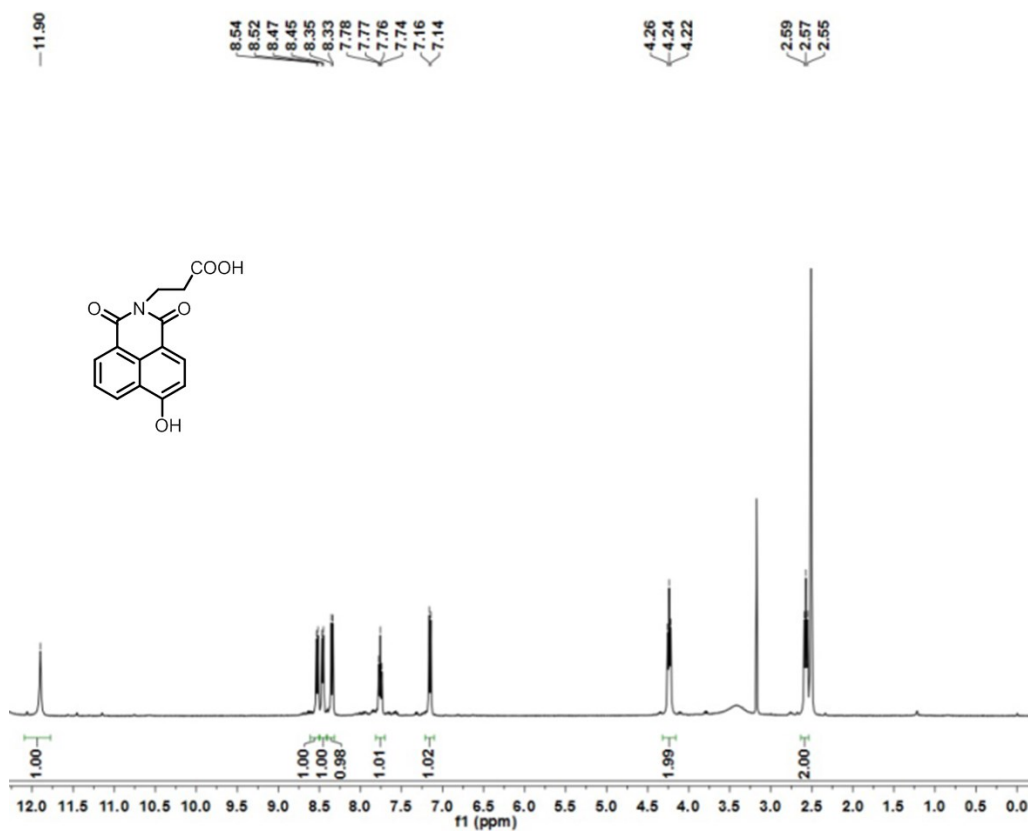

**Fig. S10**  $^1\text{H}$  NMR data of the Compound 2 (400 MHz,  $\text{DMSO}-d_6$ ).

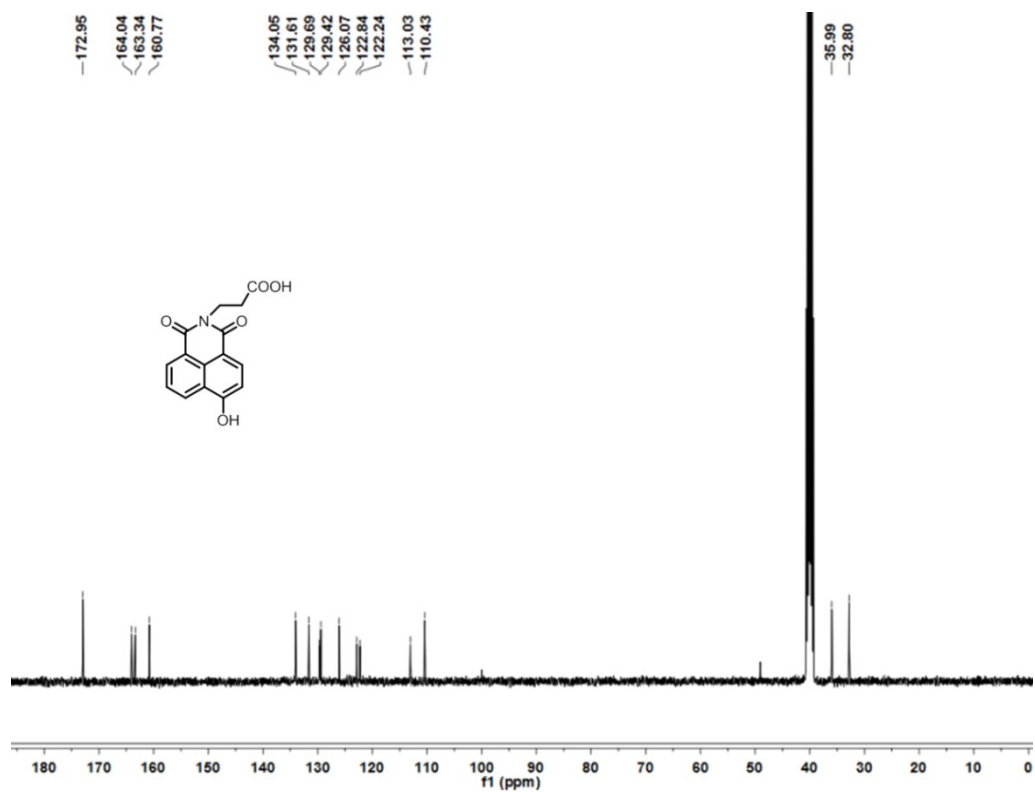

**Fig. S11**  $^{13}\text{C}$  NMR data of the Compound 2 (100 MHz,  $\text{DMSO-}d_6$ ).

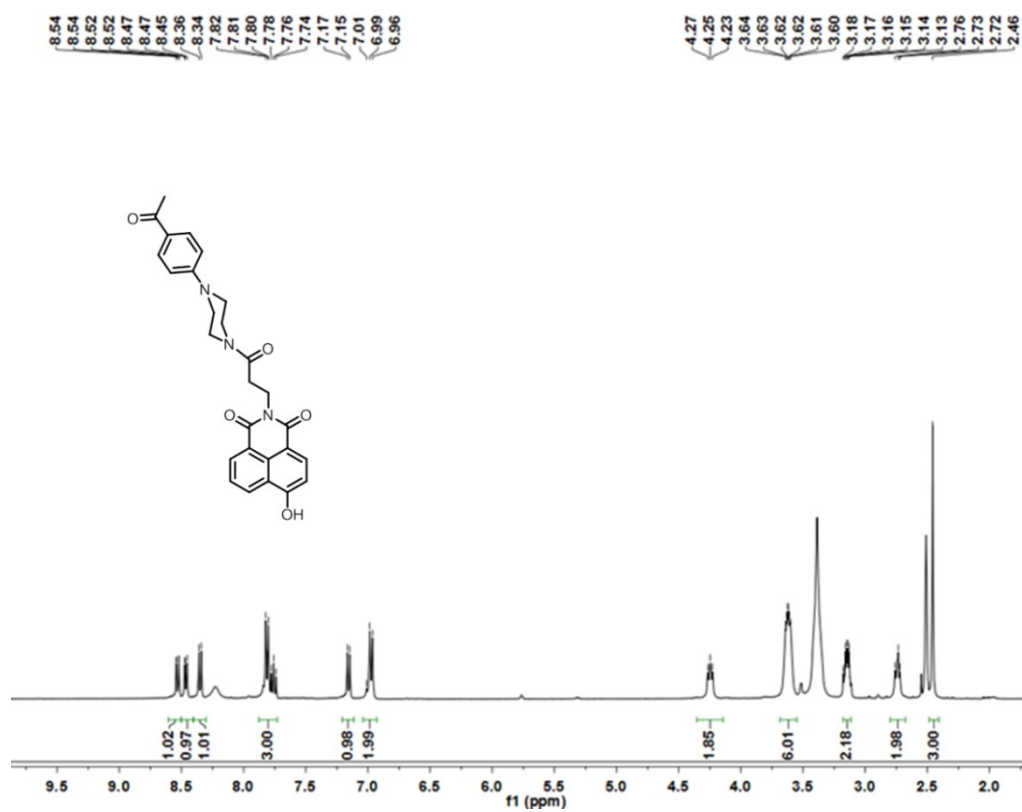

**Fig. S12**  $^1\text{H}$  NMR data of the Compound 3 (400 MHz,  $\text{DMSO-}d_6$ ).

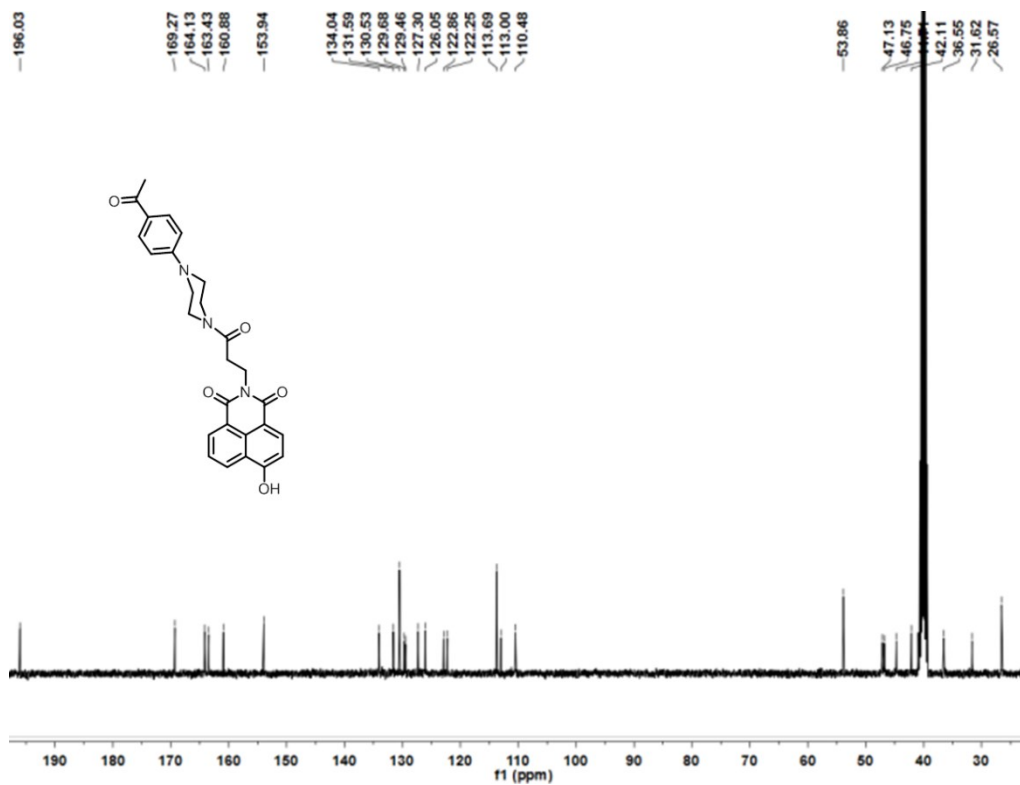

**Fig. S13** <sup>13</sup>C NMR data of the Compound 3 (100 MHz, DMSO-*d*<sub>6</sub>).

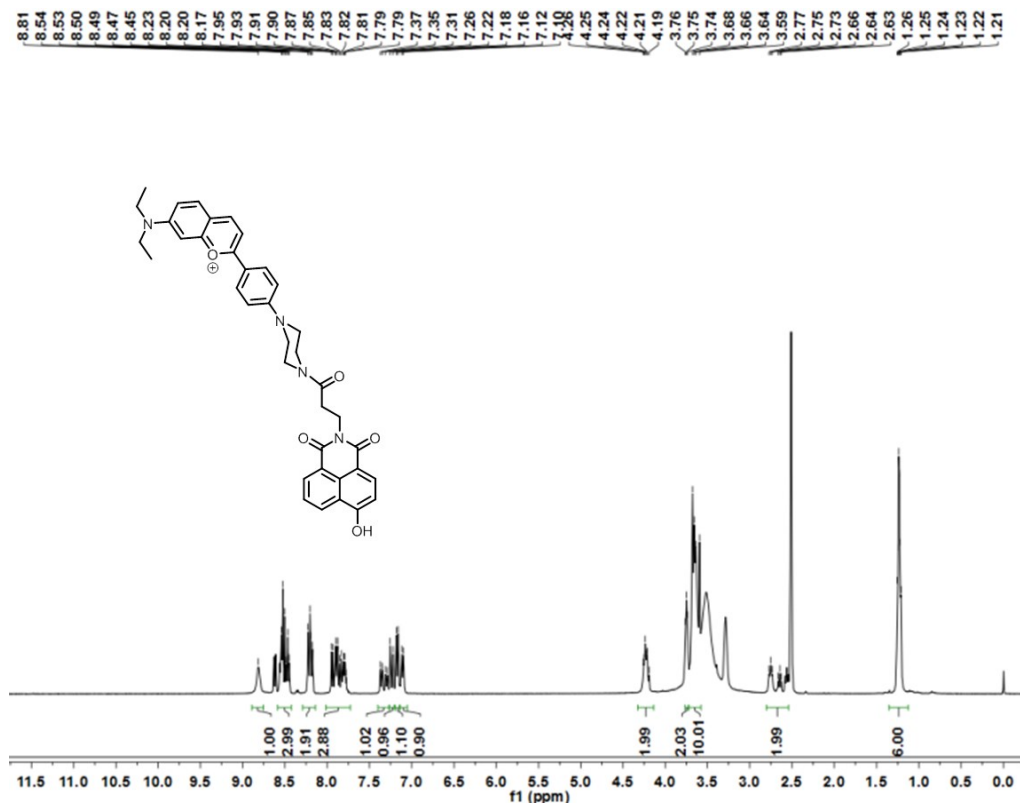

**Fig. S14** <sup>1</sup>H NMR data of the probe MNP (400 MHz, DMSO-*d*<sub>6</sub>).



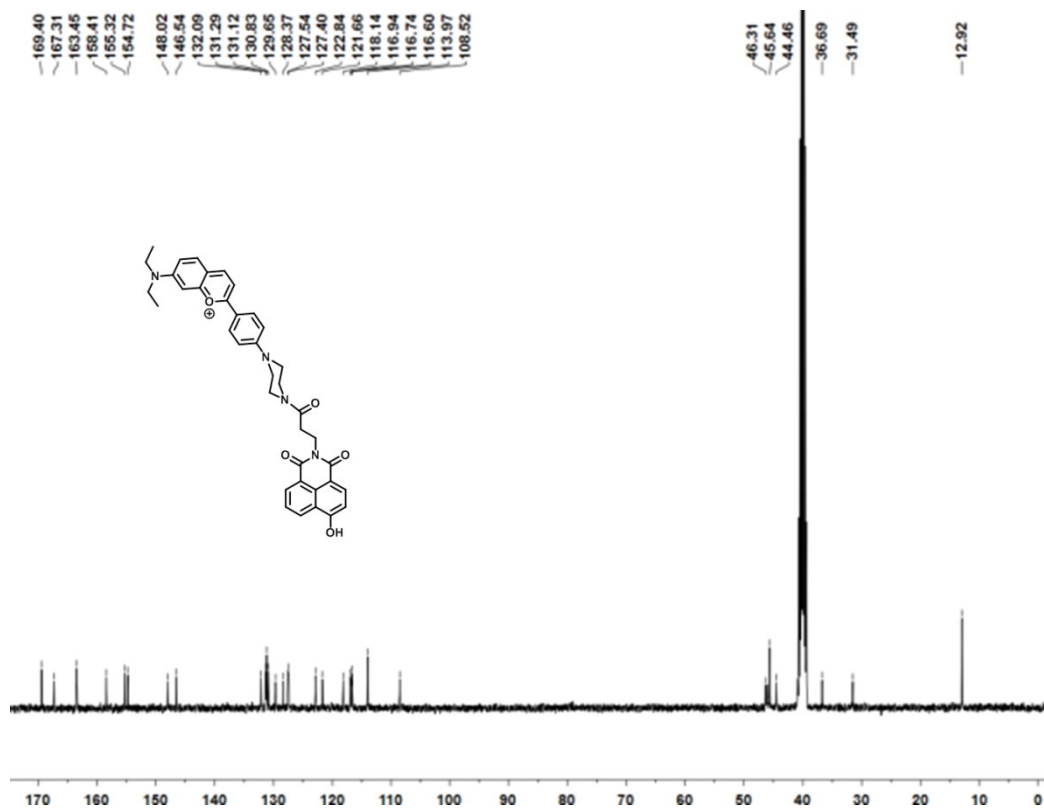

**Fig. S15**  $^{13}\text{C}$  NMR data of the probe **MNP** (100 MHz,  $\text{DMSO-}d_6$ ).

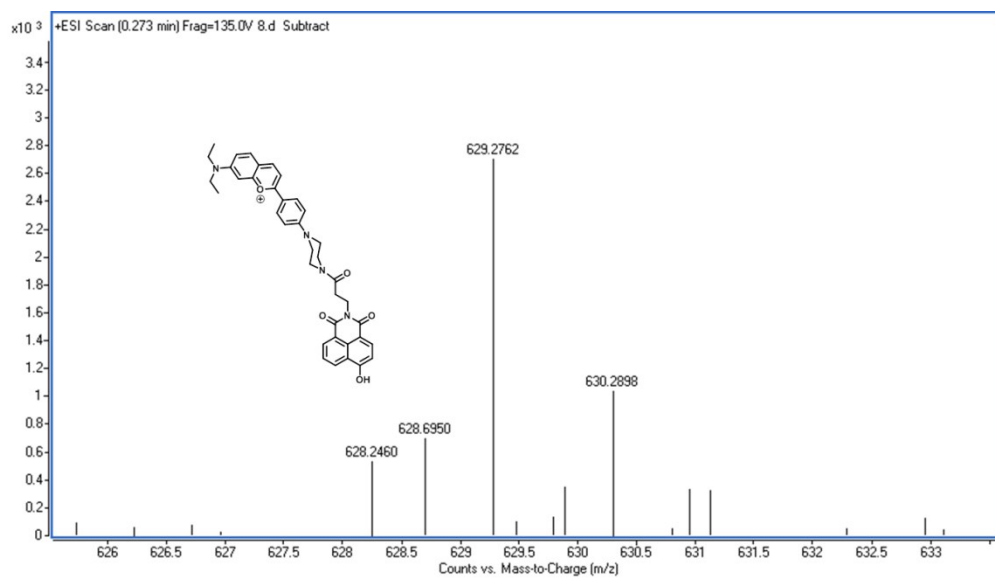

**Fig. S16** HRMS data of the probe **MNP**.

Reference:

1. Dong, B.; Lu, Ya.; Zhang, N.; Song, W.; Lin, W. Ratiometric imaging of cysteine level changes in endoplasmic reticulum during H<sub>2</sub>O<sub>2</sub>-induced redox imbalance. *Anal. Chem.* **2019**, 91, 5513–5516.
